# Supplementary material for: Identification of the nucleotide-free state as a therapeutic vulnerability for inhibition of selected oncogenic RAS mutants
Source: PubMed Central journal article supplement — Cell Rep. Author manuscript; Available in PMC 2022 Mar 21. (PMC8936000; doi:10.1016/j.celrep.2022.110322), 2022-02-08
Supplement: NIHMS1778820-supplement-1.pdf [file NIHMS1778820-supplement-1.pdf]

**Cell Reports, Volume 38**

**Supplemental information**

**Identification of the nucleotide-free state  
as a therapeutic vulnerability for inhibition  
of selected oncogenic RAS mutants**

**Imran Khan, Akiko Koide, Mariyam Zuberi, Gayatri Ketavarapu, Eric Denbaum, Kai Wen Teng, J. Matthew Rhatt, Russell Spencer-Smith, G. Aaron Hobbs, Ernest Ramsay Camp, Shohei Koide, and John P. O'Bryan**

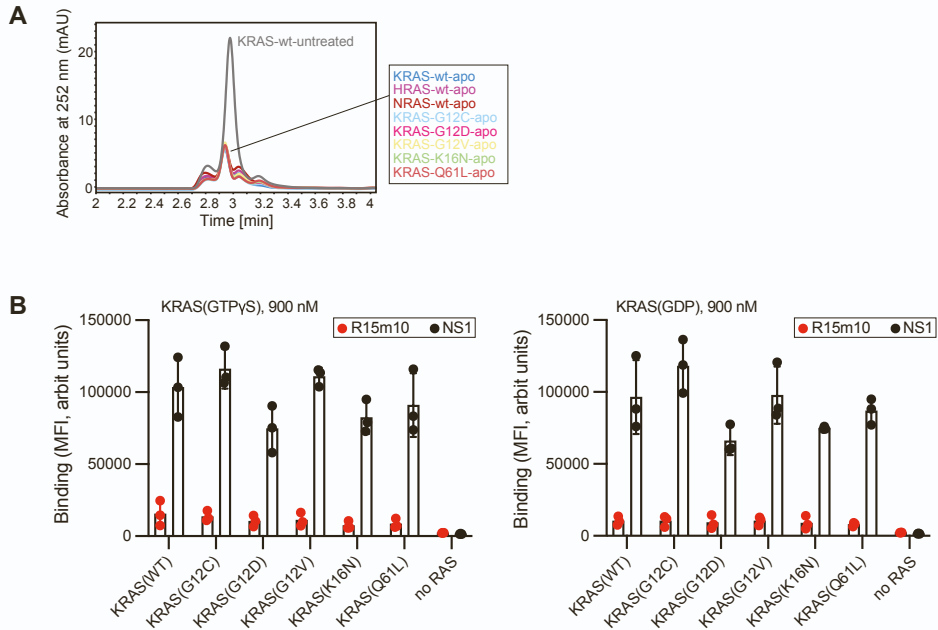

**Figure S1. Analysis of apo RAS proteins and binding characterization of R15m10 Monobody, Related to Fig. 1. A.** HPLC analysis of nucleotides released from apo mutant RAS protein samples. Each chromatogram represents data from 25  $\mu$ l of 7  $\mu$ M sample. **B.** Binding of R15m<sup>10</sup> to GTP $\gamma$ S- and GDP-loaded states of the indicated KRAS mutants as tested using yeast surface display. NS1, which is nucleotide-state agnostic, is included as a positive control.

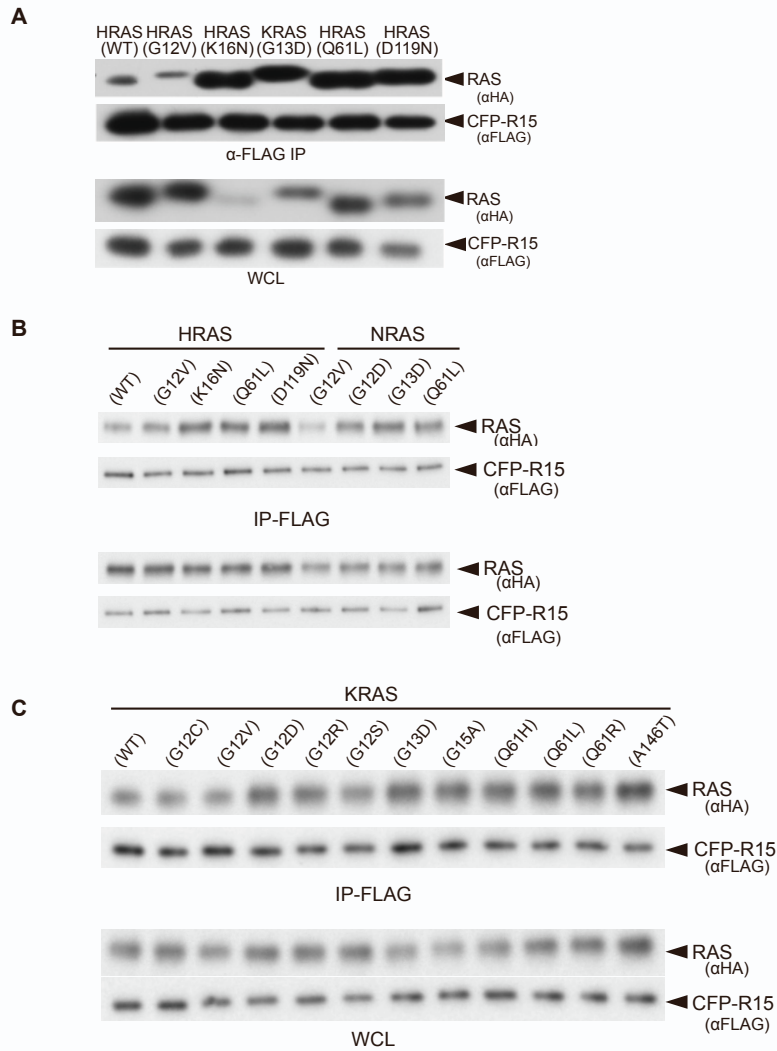

**Figure S2. Apo-specific R15 Monobody selectively binds to RAS mutants in cells, Related to Fig. 2. A.** Selected RAS mutant proteins were co-immunoprecipitated with FLAG-tagged CFP-R15 Monobody from HEK293T cell lysates. Bottom two panels, expression of HA-tagged RAS proteins and FLAG-tagged CFP Monobodies in whole cell lysates (WCL). IP, immunoprecipitation. **B&C.** Immunoprecipitation and Western blot analysis of R15m<sup>10</sup> interaction with various oncogenic mutant RAS proteins; HRAS & NRAS (B), KRAS(C). Results were repeated a total of 3 times from independent transfections and quantification of results presented in Figure 2B.

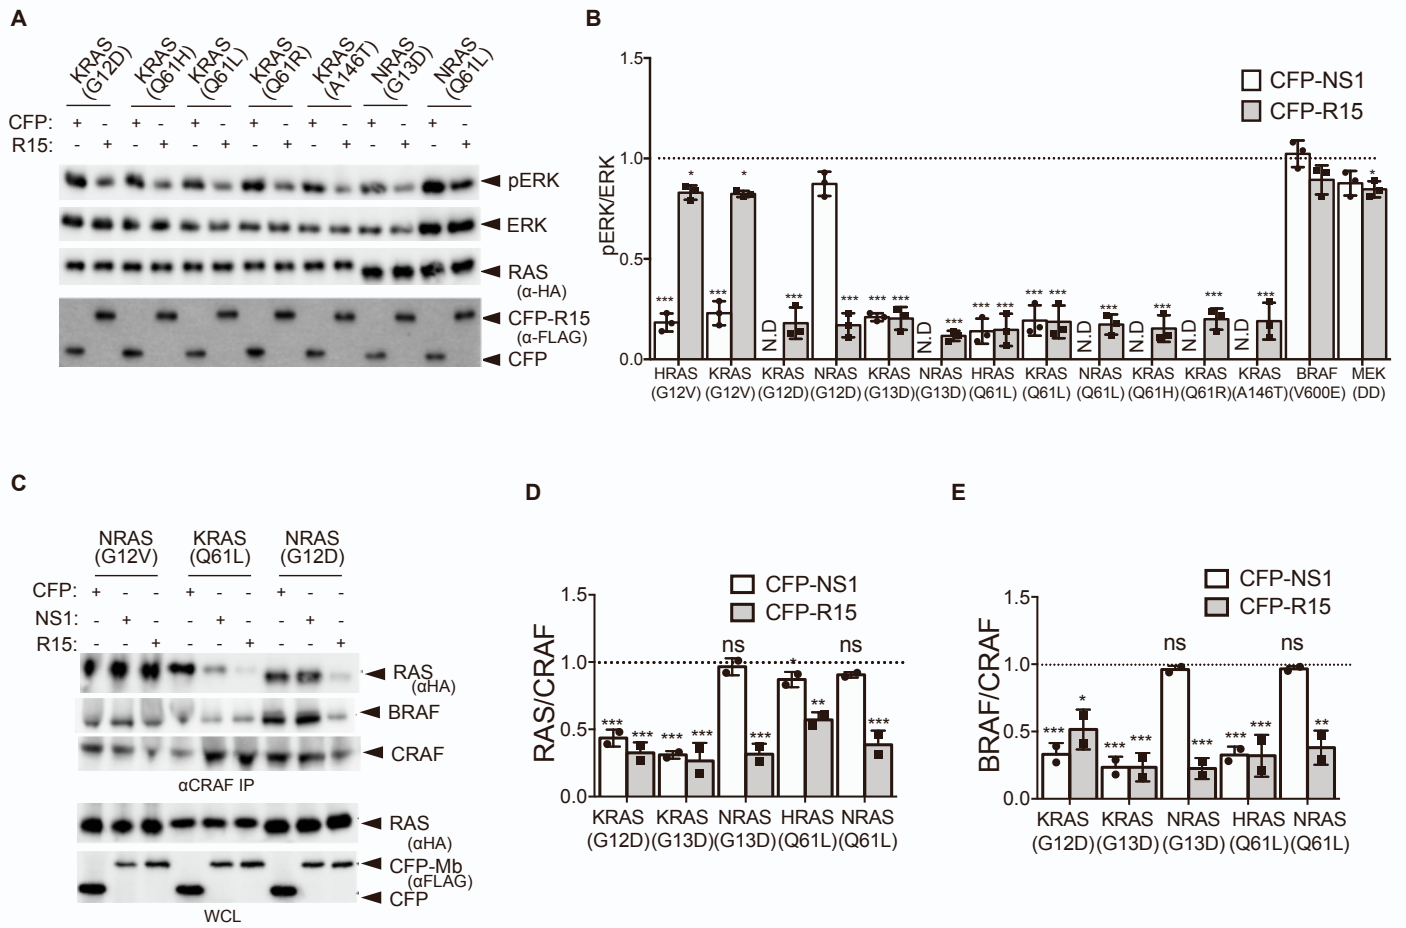

**Figure S3. Analysis of R15 effects on ERK-MAPK activation by various oncogenic RAS mutants, Related to Fig. 5.** **A.** ERK-MAPK activation was performed as described in Figure 5A and B. **B.** Quantification of ERK-MAPK activation. The results represent the average of three independent experiments +/-s.d. **C.** Effects of R15 on RAS-CRAF association and CRAF-BRAF dimers as described in Figure 5D. **D.** The quantification of R15 effects on RAS-CRAF association and CRAF-BRAF heterodimers. The results represent the average of two independent experiments +/-s.d.

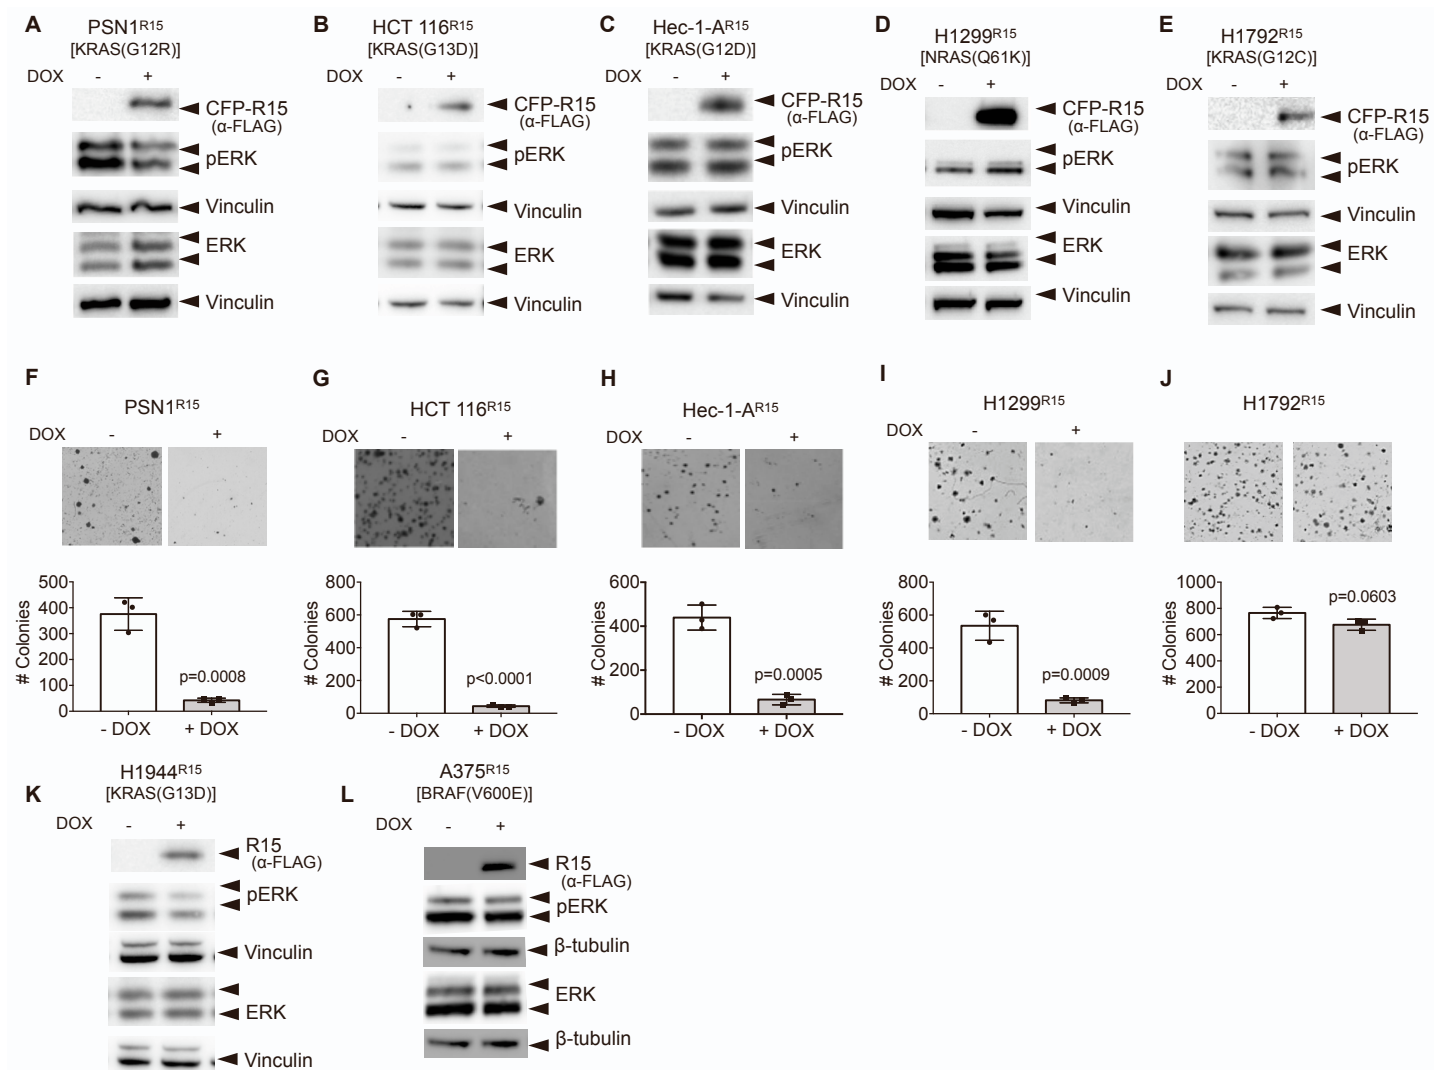

**Figure S4. Effect of R15 expression on additional human tumor lines, Related to Fig. 6.** A-E. Effect of R15 induction on ERK activation (A-E, K & L) and anchorage independent growth (F-J). Experiments were performed as described in Figure. 6. **A, F.** PSN1<sup>R15</sup>; **B, G.** HCT116<sup>R15</sup>; **C, H.** Hec1A<sup>R15</sup>; **D, I.** H1299<sup>R15</sup>; **E, J.** H1792<sup>R15</sup>; **K.** H1944<sup>R15</sup>; **L.** A375<sup>R15</sup>.

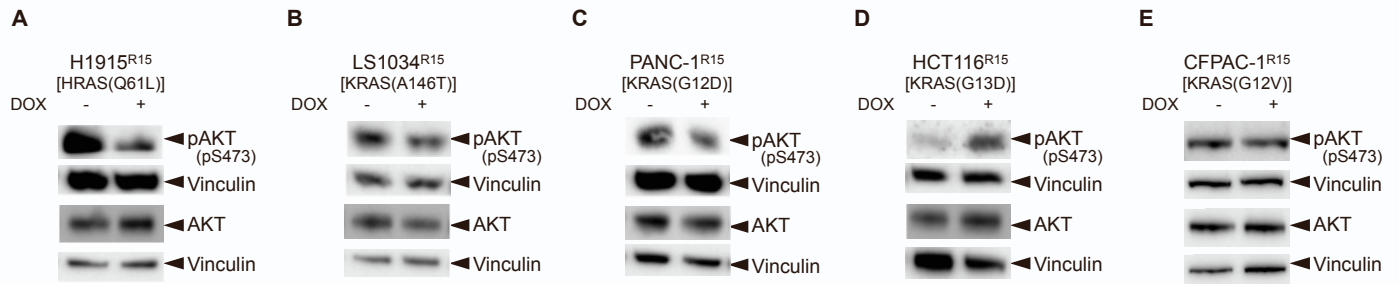

**Figure S5. Effect of R15 expression on AKT activation in human tumor cells, Related to Figs. 6 and S4.** Experiments were performed as in Figure 6A-E except Western blots were probed for pAKT<sup>S473</sup> levels.

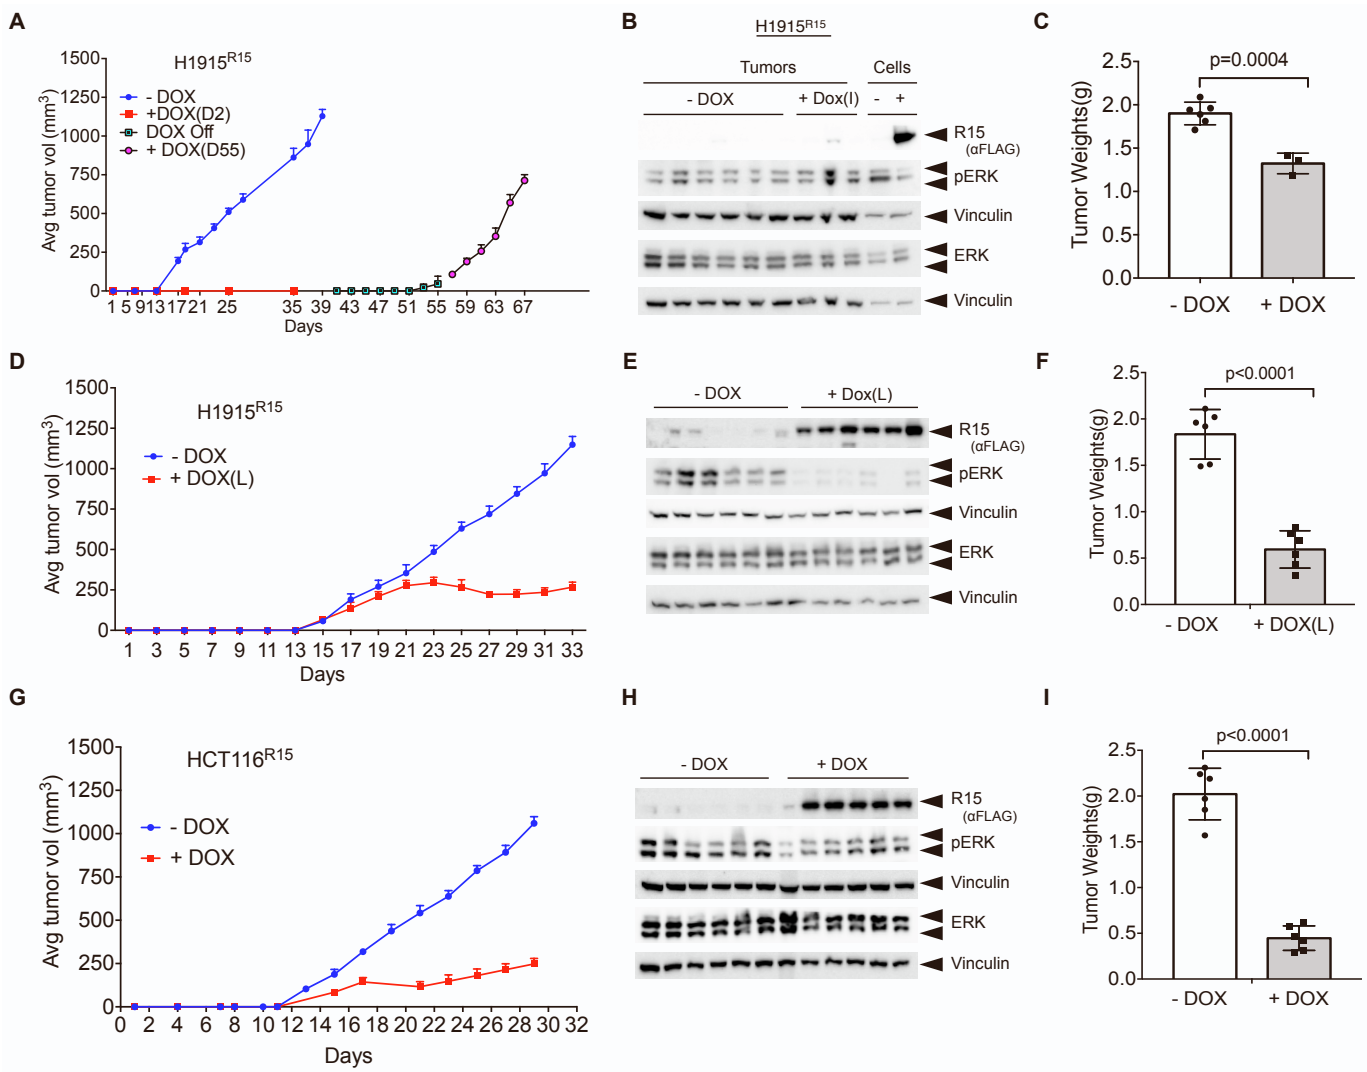

**Figure S6. R15 inhibits RAS-driven tumor development in additional cancer lines, Related to Figs. 6 and 7.** **A-F.** H1915<sup>R15</sup> cells or **G-I.** HCT116<sup>R15</sup> cells were injected into the flanks of athymic nude mice as described in Figure 7. **A.** Mice were treated with DOX (+) on the day following cell injection or left untreated (-DOX) or +DOX(D2). On Day 41, mice were removed from DOX treatment (DOX off). On Day 55, three mice that exhibited detectable tumors were placed on DOX [DOX(D55)] and tumor growth monitored for an additional 12 days. **B.** Lysates from tumors of untreated mice (Day 39, n=6) and DOX-treated animals (n=3) were analyzed for pERK levels by Western blot as described in Figure 7. The two lanes on the far right represent lysates from parental H1915<sup>R15</sup> cells grown in culture and treated +/-DOX. **C.** Average tumor weights at experimental end point. **D.** Same as in A except mice did not received DOX until tumors reached a volume of 50-70 mm<sup>3</sup> DOX(L)). **E.** Western blot analysis of tumor lysates as described in Figure 7. **F.** Average tumor weights at experimental end point of H1915<sup>R15</sup>DOX(L). **G.** Mice were treated with DOX (+) on the day following cell injection or left untreated and then monitored for tumor development. Average tumor volume (n=6 per condition) **H.** Tumor lysates were analyzed for pERK levels as in B,E. **I.** Average tumor weights at experimental end point of HCT116<sup>R15</sup>.

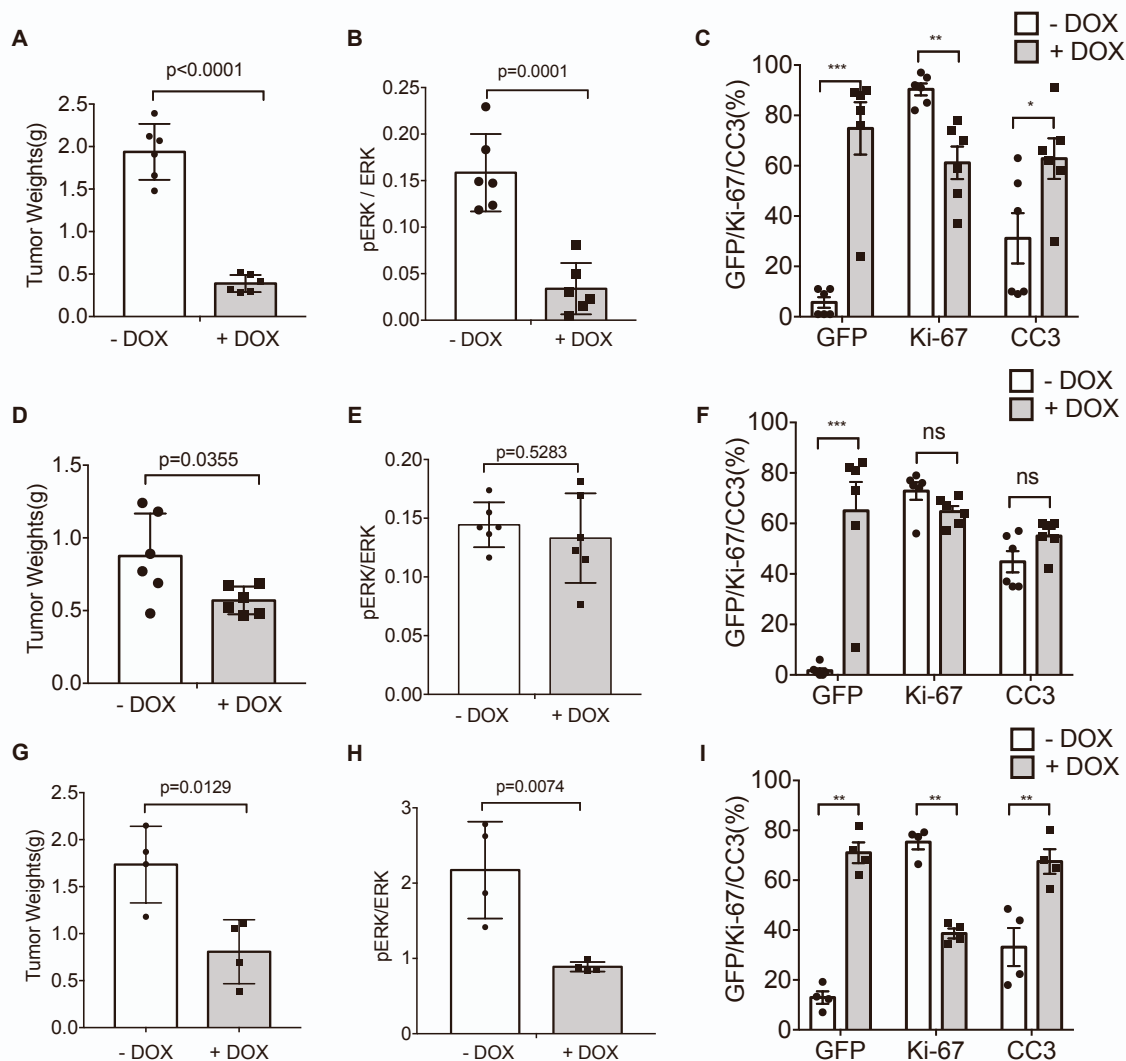

**Figure S7. R15 selectively inhibits tumors by decreasing proliferation and inducing apoptosis, Related to Figs. 6 and 7.** Effects of DOX induced R15 expression on tumor weights in PDAC xenografts and CRC PDXs. PANC-1(A), CFPAC-1 (D) and huRC/MRC30 (G). Quantification of MAPK signaling from tumor lysates of PANC-1 (B), CFPAC-1 (E) and huRC/MRC30 (H). Tumors from PANC-1<sup>R15</sup> and CFPAC-1<sup>R15</sup> PDACs and huRC/MRC30<sup>R15</sup> were phenotyped by immunohistochemistry for R15(GFP), Ki-67 and cleaved Caspase-3(CC3). **C.** Proportion of Ki-67, and CC3 cells for untreated and +DOX mice in KRAS(G12D) mutant PDACs. **F.** Same as in **C** in KRAS(G12V) mutant PDACs. **I.** Same as in **C, F** for KRAS(G12D) colorectal PDX.



| Cell Line | Origin | Mutation    |
|-----------|--------|-------------|
| NCI-H1915 | NSCLC  | HRAS(Q61L)  |
| LS1034    | CRC    | KRAS(A146T) |
| HuP-T3    | PDAC   | KRAS(G12R)  |
| PANC-1    | PDAC   | KRAS(G12D)  |
| CFPAC-1   | PDAC   | KRAS(G12V)  |
| PSN-1     | PDAC   | KRAS(G12R)  |
| HCT 116   | CRC    | KRAS(G13D)  |
| Hec-1-A   | EAC    | KRAS(G12D)  |
| NCI-H1299 | NSCLC  | NRAS(Q61K)  |
| NCI-H1792 | LAC    | KRAS(G12C)  |
| NCI-H1944 | NSCLC  | KRAS(G13D)  |
| A375      | MM     | BRAF(V600E) |

NSCLC: Non small cell lung carcinoma  
CRC: Colorectal carcinoma  
PDAC: Pancreatic ductal adenocarcinoma  
EAC: Endometrial adenocarcinoma  
LAC: Lung adenocarcinoma  
MM: Metastatic Melanoma

**Table S1. Description of the origin and mutation status of various human tumor cell lines. Related to Figs. 6, 7, S5-S7.**
